# Supplementary material
Source: PubMed Central journal article supplement (PMC2586602)

**Supplementary Fig.1**

**No Serum**

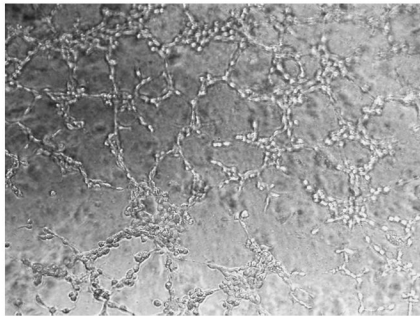

**Mock-CM**

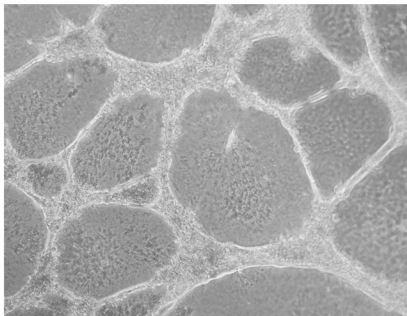

**Ad-SV-CM**

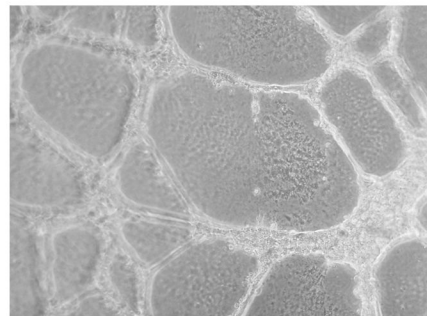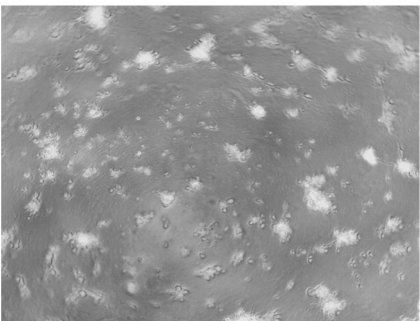

**Ad-MMP-2-CM**

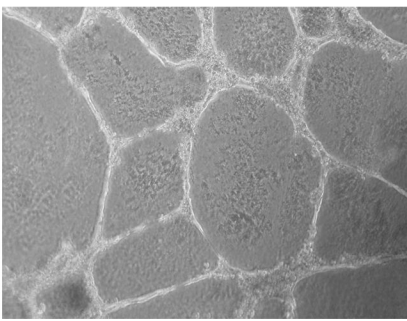

**Dn-ERK + Ad-SV**

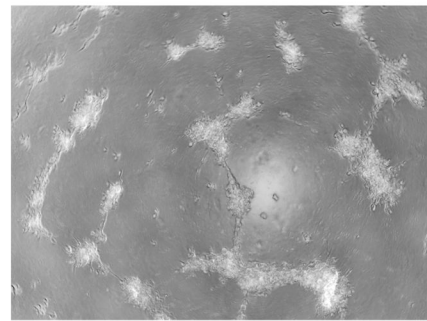

**Dn-ERK + Ad-MMP-2-CM**

Supplement: NIHMS46627-supplement-supplement_1.pdf [file NIHMS46627-supplement-supplement_1.pdf]
